# Supplementary material
Source: publisher site journal article supplement (https://oneecosystem.pensoft.net/article/download/suppl/6814369/)
Supplement: Supplementary file 1

## Sheet: Tabelle1
	Courtyard	1	2	3	4
Items accessibility and amenity assessment
	Area (m²)	2609.28	3158.22	3113.85	3141
Path length	Path length per area (m/m²)*	0.14	0.125	0.123	0.119
Garden	Private garden (m²)	271	0	505	0
	Community garden (m²)	0	129	0	0
	Total garden area (m²)	271	129	505	0
	Garden per 100m²*	10.386	4.08458	16.2179	0
Playground	Playground area (m²)	0	141	237	76
	Playground per 100m²*	0	4.46454	7.61116	2.41961
Benches	Number of benches	6	5	0	4
	Benches per 100m²*	0.229948	0.158317	0	0.127348
Clothes lines	Length of clothes lines (m)	12.72	61.36	167.1	70.98
	Clothes lines per 100m²*	0.487491	1.94287	5.36635	2.25979
Bike racks	Number of bike racks	0	7	0	3
	Bike racks per 100m²*	0	0.221644	0	0.095511
Waste bins	Number of waste bins	2	1	0	1
	Waste bins per 100m²*	0.0766495	0.0316634	0	0.031837
Lanterns	Number of lanterns	1	1	0	1
	Lanters per 100m²*	0.0383247	0.0316634	0	0.031837
	* used in accessibility and amenity assessment (Manuscript Table 8)
